# Supplementary material for: Discovering Periodic Patterns in Historical News
Source: PLOS journal article supplement (doi:10.1371/journal.pone.0165736), 2016-11-08
Supplement: S6 (10.1371/journal.pone.0165736.s006) [file journal.pone.0165736.s006]

**S2 Table. Strongly periodic words by category in the US.**

| Category    | Word Stems                                                                                                                                                                                                                                                                                                                                                                                                                                                                                                                                                                                                                                                                                                                                                                                                                                                                                                                                                                                                                                                                                                                                                                                                                                                                                                                                                                                                                                                                                                                                        |
|-------------|---------------------------------------------------------------------------------------------------------------------------------------------------------------------------------------------------------------------------------------------------------------------------------------------------------------------------------------------------------------------------------------------------------------------------------------------------------------------------------------------------------------------------------------------------------------------------------------------------------------------------------------------------------------------------------------------------------------------------------------------------------------------------------------------------------------------------------------------------------------------------------------------------------------------------------------------------------------------------------------------------------------------------------------------------------------------------------------------------------------------------------------------------------------------------------------------------------------------------------------------------------------------------------------------------------------------------------------------------------------------------------------------------------------------------------------------------------------------------------------------------------------------------------------------------|
| Activities  | artist, banquet, beach, boat, circu, climb, comedi, comedian, cottag, dramat, drive, entertain, excurs, exhibitor, firework, hammock, holiday, masquerad, matine, opera, parad, parti, pavilion, picnic, regatta, seashor, seasid, sled, sleigh, surf, symphoni, tent, theater, theatr, visit, visitor, yacht, band, chautauqua, lectur, park, pianist, read, skate, soprano, swim, trip, vacat, violinist, barbecu, bather, cursion, excur, sonata, swimmer                                                                                                                                                                                                                                                                                                                                                                                                                                                                                                                                                                                                                                                                                                                                                                                                                                                                                                                                                                                                                                                                                      |
| Agriculture | crop, field, harvest, pastur, plant, ripe, seed, straw, thresh, weed, acreag, buckwheat, millet, reaper, thresher, wheat, scyth, sprinkler                                                                                                                                                                                                                                                                                                                                                                                                                                                                                                                                                                                                                                                                                                                                                                                                                                                                                                                                                                                                                                                                                                                                                                                                                                                                                                                                                                                                        |
| Disease     | bronchial, colic, cough, diarrhoea, dysenteri, throat, typhoid, croup, pneumonia, pneu, monia                                                                                                                                                                                                                                                                                                                                                                                                                                                                                                                                                                                                                                                                                                                                                                                                                                                                                                                                                                                                                                                                                                                                                                                                                                                                                                                                                                                                                                                     |
| Fashion     | clearanc, cloak, cloth, coat, curtain, decor, fleec, latest, millineri, mink, muff, newest, plush, style, stylish, tailor, trim, velvet, waist, wear, woolen, cashmer, flannel, foulard, fur, gingham, merino, minc, mitten, overcoat, chambrai, chinchilla, ermin, furrier, muffler                                                                                                                                                                                                                                                                                                                                                                                                                                                                                                                                                                                                                                                                                                                                                                                                                                                                                                                                                                                                                                                                                                                                                                                                                                                              |
| Flowers     | blossom, flower                                                                                                                                                                                                                                                                                                                                                                                                                                                                                                                                                                                                                                                                                                                                                                                                                                                                                                                                                                                                                                                                                                                                                                                                                                                                                                                                                                                                                                                                                                                                   |
| Food        | cucumb, egg, fish, melon, oyster, poultrei, radish, sausag, soda, strawberri, appl, asparagu, beer, blackberri, cranberri, cream, lemonad, lettuc, pea, pumpkin, watermelon, cantaloup, gooseberri, grenadin, rhubarb, spinach                                                                                                                                                                                                                                                                                                                                                                                                                                                                                                                                                                                                                                                                                                                                                                                                                                                                                                                                                                                                                                                                                                                                                                                                                                                                                                                    |
| Hunting     | beaver, gees, hog, quail, trout, game, rabbit                                                                                                                                                                                                                                                                                                                                                                                                                                                                                                                                                                                                                                                                                                                                                                                                                                                                                                                                                                                                                                                                                                                                                                                                                                                                                                                                                                                                                                                                                                     |
| Politics    | adjourn, bill, chairman, congression, legi, legisla, legislatur, resolut, debat, judiciari, legisl, lobbi, senat, dental, gression, presidenti                                                                                                                                                                                                                                                                                                                                                                                                                                                                                                                                                                                                                                                                                                                                                                                                                                                                                                                                                                                                                                                                                                                                                                                                                                                                                                                                                                                                    |
| Sport       | catch, catcher, fan, jump, out, pass, pitch, pitcher, stump, throw, winner, cricket, footbal, goal, race, saratoga, score, tenni, umpir, won, croquet, grounder, hockei                                                                                                                                                                                                                                                                                                                                                                                                                                                                                                                                                                                                                                                                                                                                                                                                                                                                                                                                                                                                                                                                                                                                                                                                                                                                                                                                                                           |
| Time        | april, august, autumn, birthdai, dec, decem, decemb, feb, february, jan, jane, janu, januar, july, juii, jul, juli, jun, juno, mai, novemb, oct, oet, pec, ruari, sep, septem, septemb, spring, summer, sundai, tember, uari, ult, vember, winter, year, apr, april, aug, cember, deo, ept, fall, febru, januari, jau, julv, june, mar, march, mav, mber, nov, novem, ocl, octo, octob, sept, tober, apri, april, augu, auguat, bept, februar, feh, jali, jne, juna, juue, jyl, keb, midsumm, oci, peb, pril, sepl, sommer, sopt, xov                                                                                                                                                                                                                                                                                                                                                                                                                                                                                                                                                                                                                                                                                                                                                                                                                                                                                                                                                                                                             |
| Weather     | blizzard, cool, drought, freez, heat, hot, lightn, sleet, snow, sun, rain, breez, cold, colder, cooler, frozen, gust, shad, shadi, thunder, coldest, coolest, hottest, inclement                                                                                                                                                                                                                                                                                                                                                                                                                                                                                                                                                                                                                                                                                                                                                                                                                                                                                                                                                                                                                                                                                                                                                                                                                                                                                                                                                                  |
| Other       | 2b, 2s, 3b, ap, appropri, around, asburi, bath, beaten, bumper, bunt, chariti, christina, clip, committe, convent, crab, crate, crowd, dash, discuss, down, drill, drouth, drown, dusti, encamp, fab, fair, fare, fly, foal, fodder, fourth, gather, gauz, glen, graduat, ground, handicap, hit, hous, incorpor, indoor, inli, intro, joint, kersei, latur, lec, lution, matter, mitte, mosquito, mower, msy, nainsook, niagara, nic, night, nobbi, oc, off, orat, organdi, oxford, pace, parasol, pattern, percal, piqu, place, preparatori, present, propriat, prospect, pull, refer, refriger, reopen, resort, reunion, sabl, second, sen, snake, speed, sprinkl, squirrel, start, starter, stove, straight, stretch, stroke, supper, surround, swarm, synod, thei, trot, turn, wash, washabl, where, while, airi, almanac, apl, appro, appropria, ari, awn, base, batist, beat, ber, blanket, bug, buggi, bunch, calendar, candid, canva, caught, dee, duster, ember, fastest, garden, grass, heater, hors, hummer, imperson, insect, introduc, jel, lake, lawn, left, leghorn, lisl, member, messag, mountain, ocean, pend, pic, pick, platform, ponge, priation, provid, rake, recreat, reduc, refresh, relat, reso, resolu, return, ride, round, run, sheer, shower, stop, struck, suggest, sulphur, swing, thirsti, ticket, toi, troduc, water, zero, adirondack, baee, baso, carpet, debutant, decern, enow, freezer, goer, kraut, lenten, lynx, mareh, maroh, myl, navel, oversho, presbyteri, rattlesnak, sealskin, sunburn, thermomet |
